# Supplementary material for: QTL mapping of antixenosis resistance to common cutworm (Spodoptera litura Fabricius) in wild soybean (Glycine soja)
Source: PubMed Central journal article supplement (PMC5726720; doi:10.1371/journal.pone.0189440), 2017-12-12

A 2012

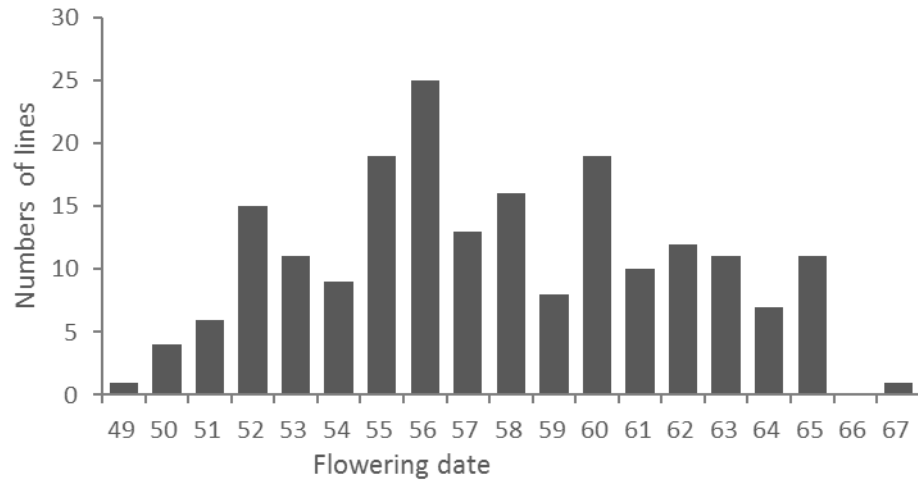

B 2013

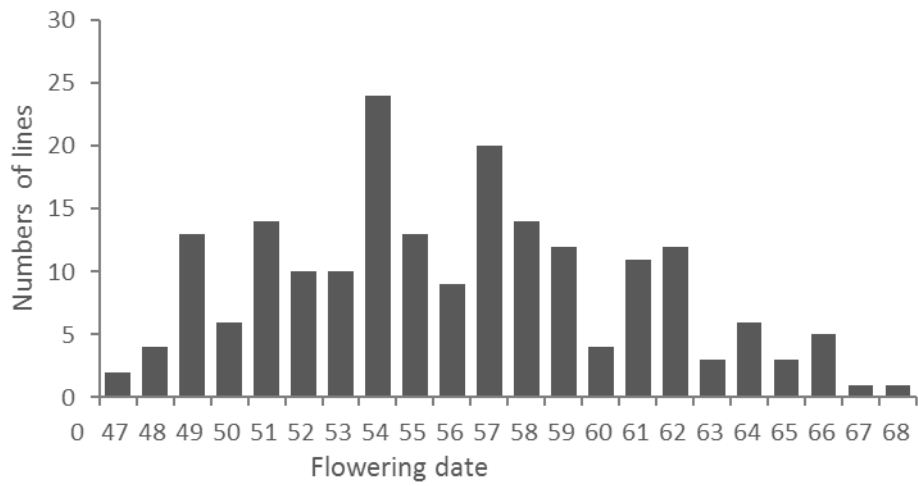

Supplement: pone.0189440.s002.pdf [file pone.0189440.s002.pdf]
